# Supplementary material for: Prolonged production of 14C during the ~660 BCE solar proton event from Japanese tree rings
Source: PubMed Central journal article supplement (PMC6971252; doi:10.1038/s41598-019-57273-2), 2020-01-20
Supplement: 41598_2019_57273_MOESM1_ESM.pdf [file 41598_2019_57273_MOESM1_ESM.pdf]

## Supplementary Information

Prolonged production of  $^{14}\text{C}$  during the ~660 BCE solar proton event from Japanese tree rings

Hirohisa Sakurai <sup>1</sup>, Fuyuki Tokanai <sup>1</sup>, Fusa Miyake <sup>2</sup>, Kazuho Horiuchi <sup>3</sup>, Kimiaki Masuda <sup>2</sup>, Hiroko Miyahara <sup>4</sup>, Motonari Ohyama <sup>5</sup>, Minoru Sakamoto <sup>6</sup>, Takumi Mitsutani <sup>7</sup>, Toru Moriya <sup>1</sup>

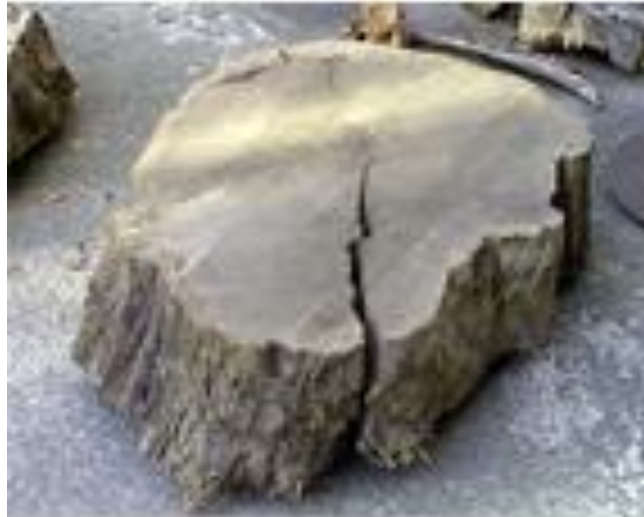

Fig. S1: A photograph of the Choukai-Jindai Cedar (Sakurai et al. 2006, Takahashi et al. 2010). The wood was dug out from a foot of Choukai volcano located at the northern Japan (39°05' N, 140°03' E) in 1996. The Choukai-Jindai Cedar contains approximately 320 tree rings. The wood sample was so well preserved under the ground that the clear barks were retained on the outside. The outermost ring was dated to 466 BCE from a dendrochronological record.

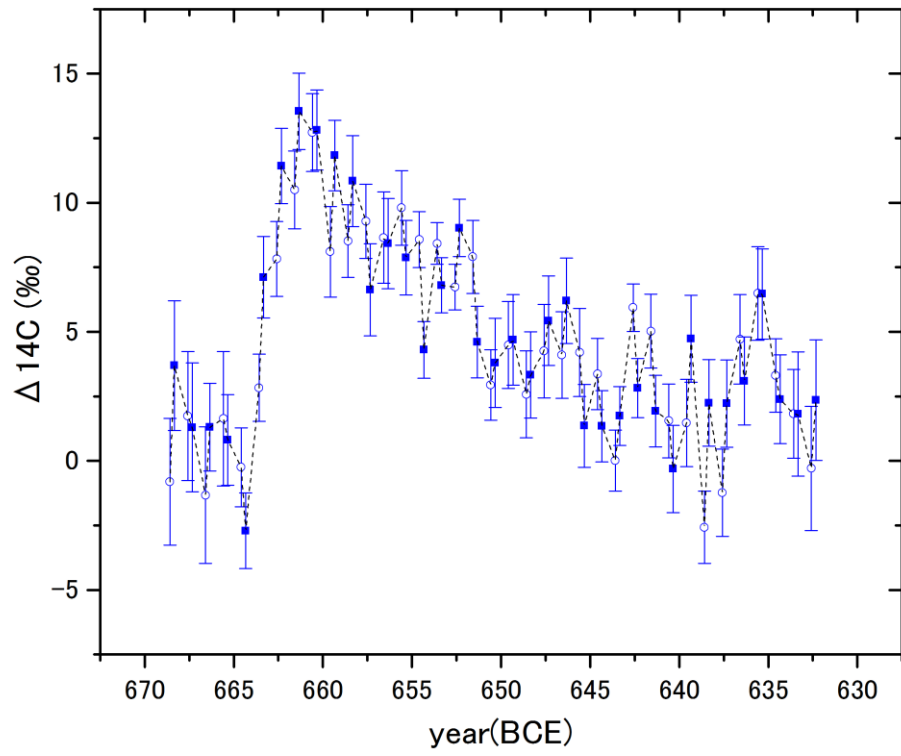

Fig. S2: Measured  $^{14}\text{C}$  concentrations in earlywoods (open circles) and latewoods (solid squares) of annual rings of the Choukai-Jindai Cedar for 669–633 BCE.

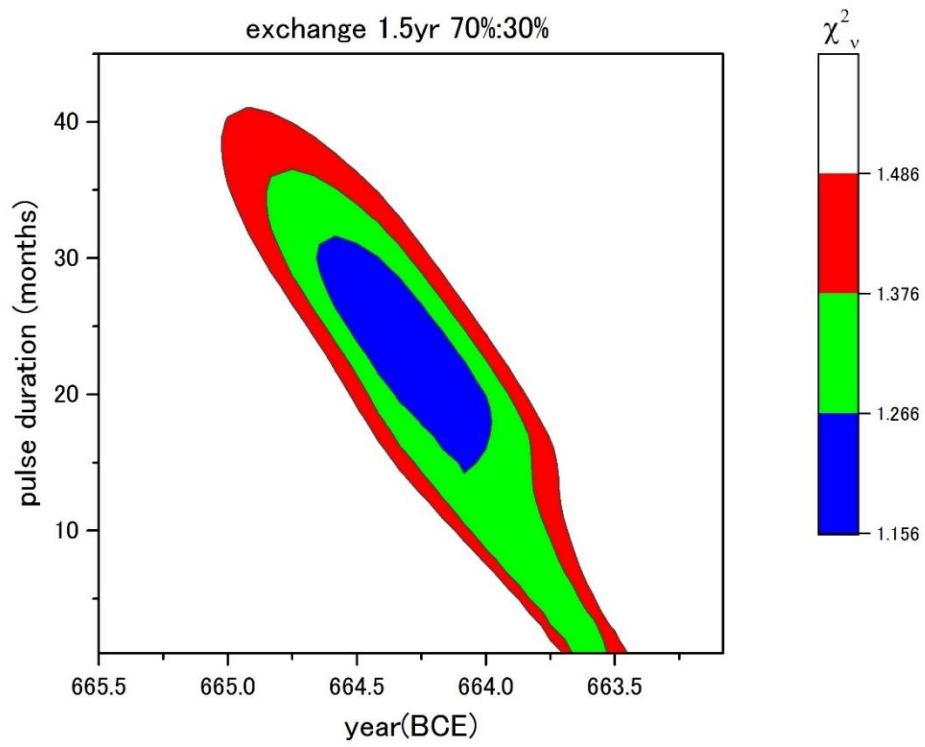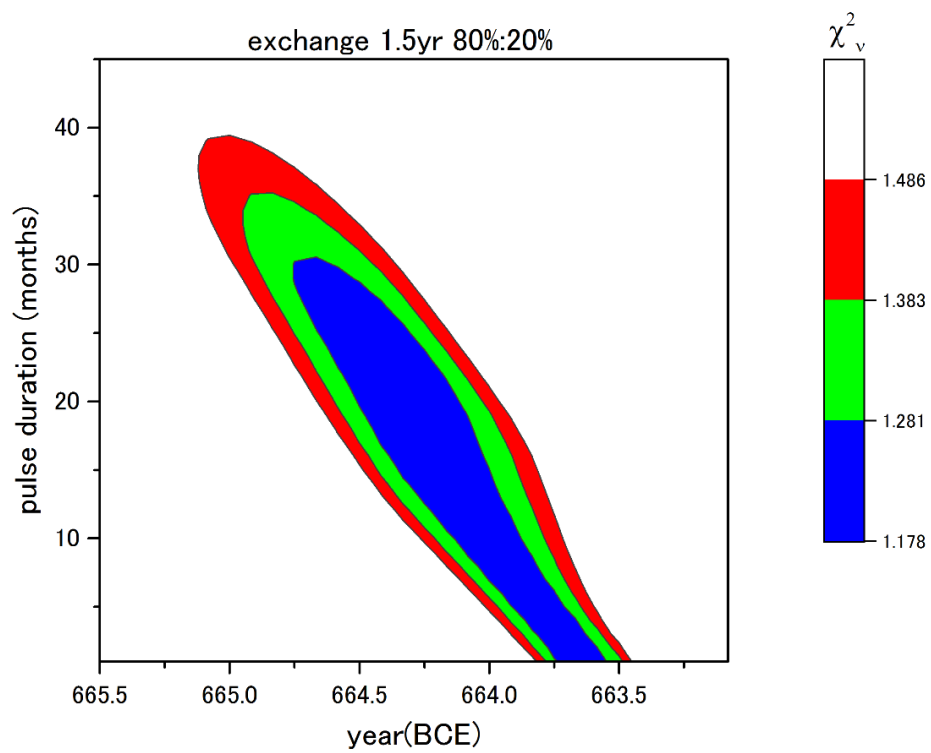

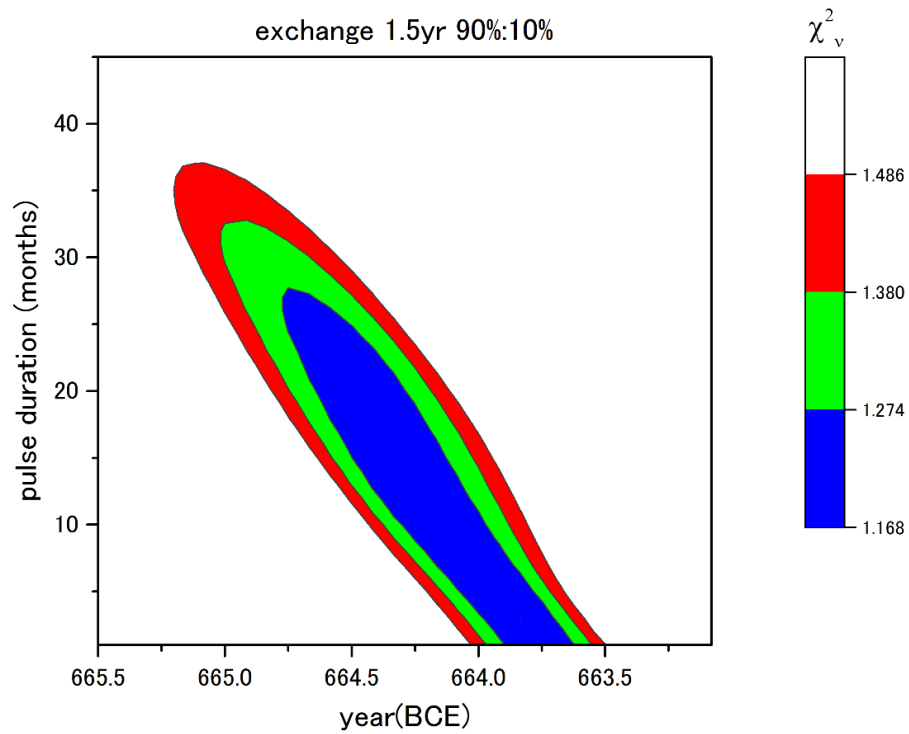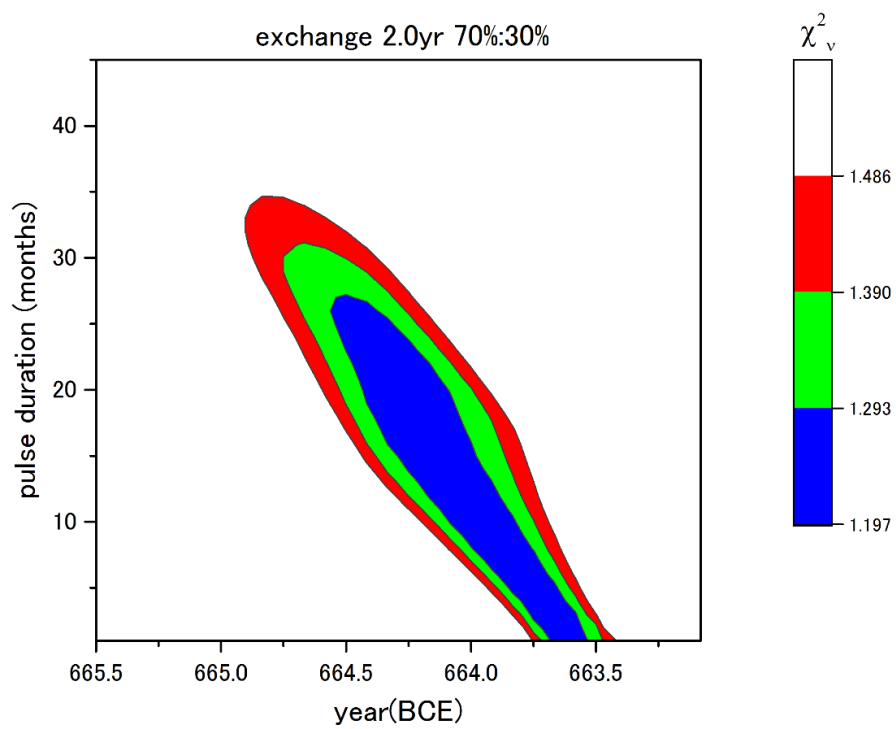

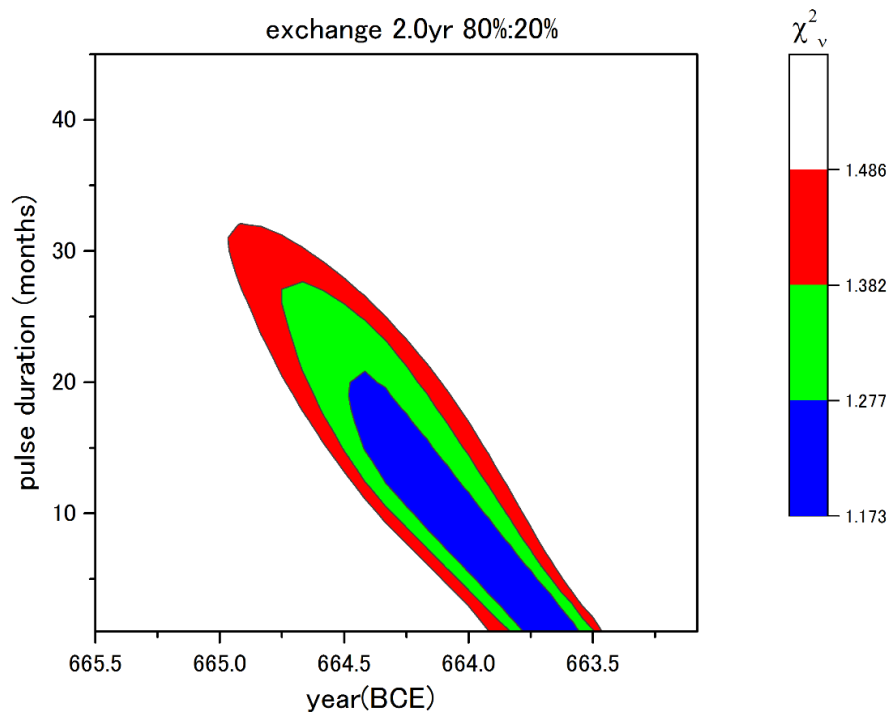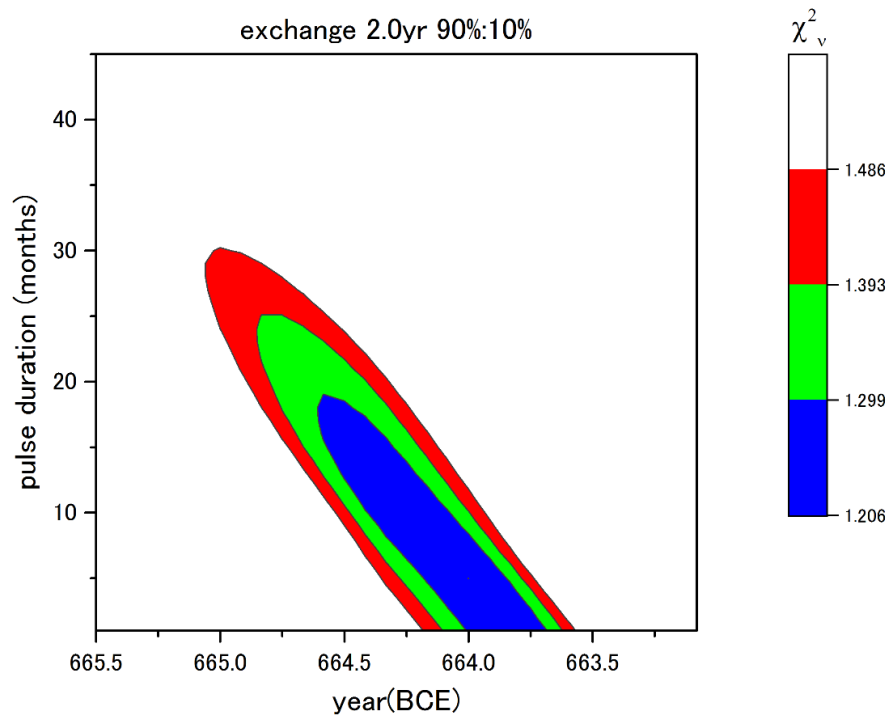

Fig. S3: The fitting results using the 11-box model (single-pulsed event). These contour maps are the best fitted pulse height for each condition, i.e. the exchange time between stratosphere and troposphere: 1.5-year and 2.0-year, and the <sup>14</sup>C input production share rate between stratosphere and troposphere: 70%:30%, 80%:20%, and 90%:10%.

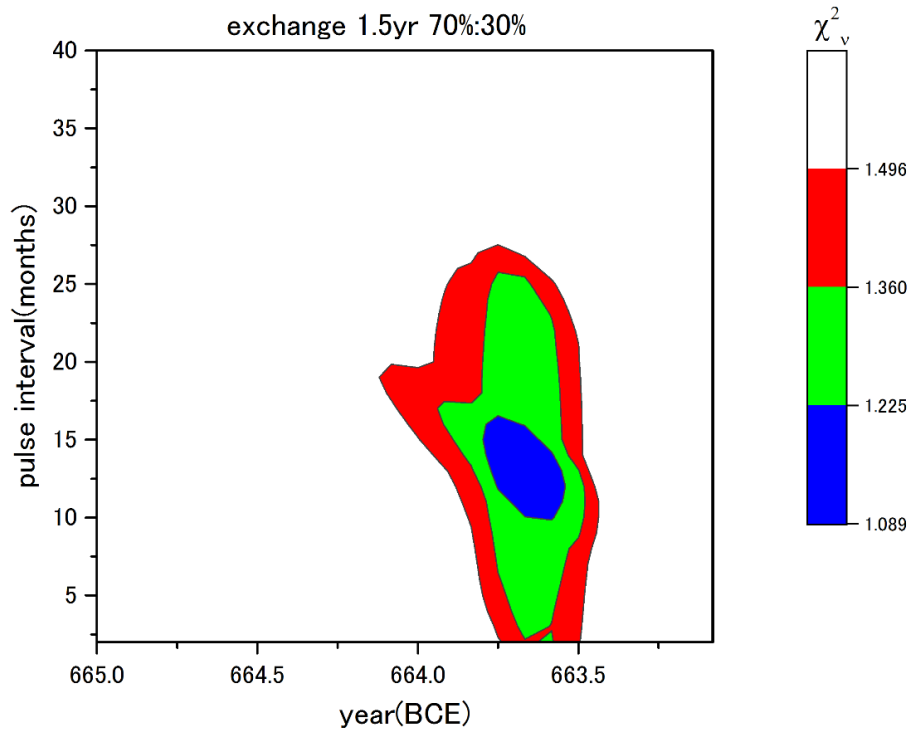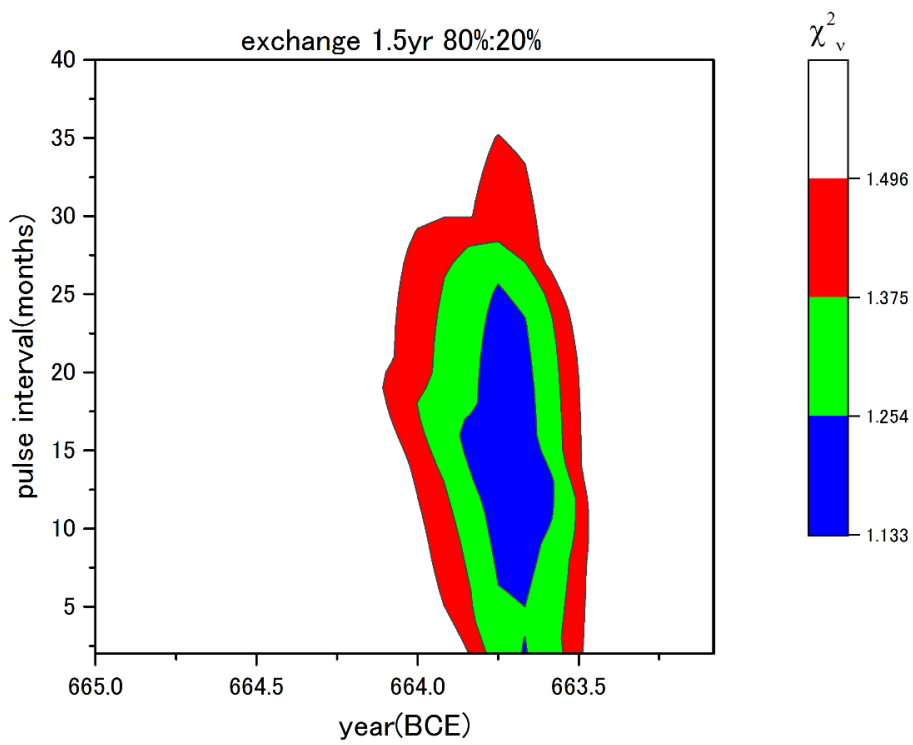

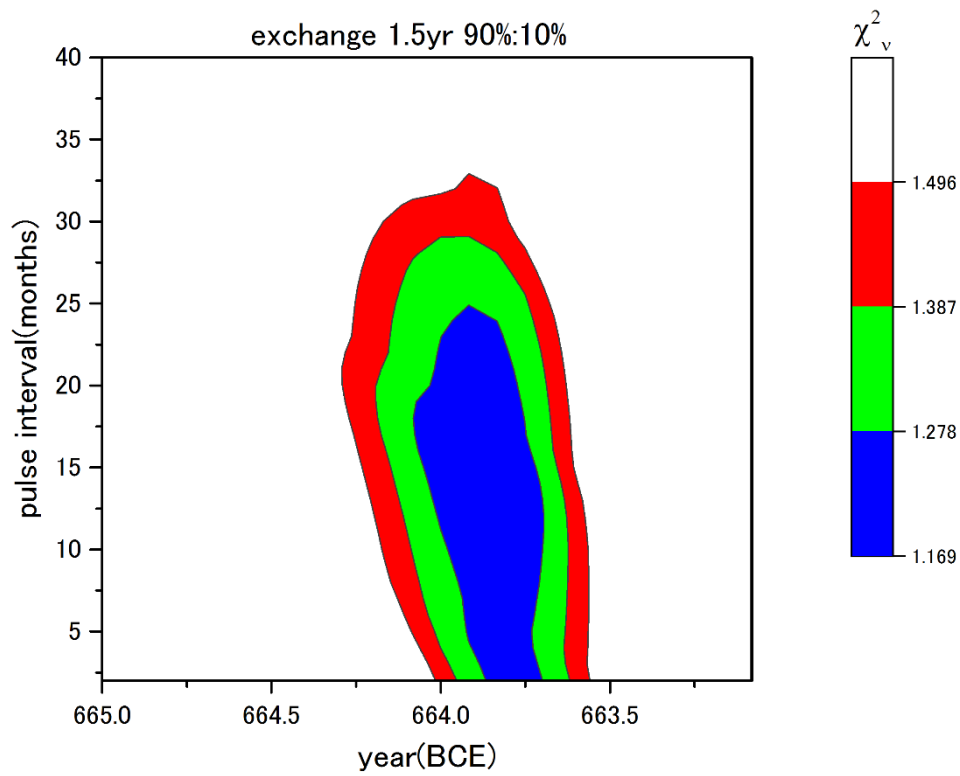

Fig. S4: The fitting results using the 11-box model (double-pulsed event). The X-axis and Y-axis indicate the timing of the first pulse and the length of the interval between two pulses, respectively. These contour maps are the best fitted pulse height for each condition, i.e. the exchange time between stratosphere and troposphere: 1.5-year, and the  $^{14}\text{C}$  input production share rate between stratosphere and troposphere: 70%:30%, 80%:20%, and 90%:10%.

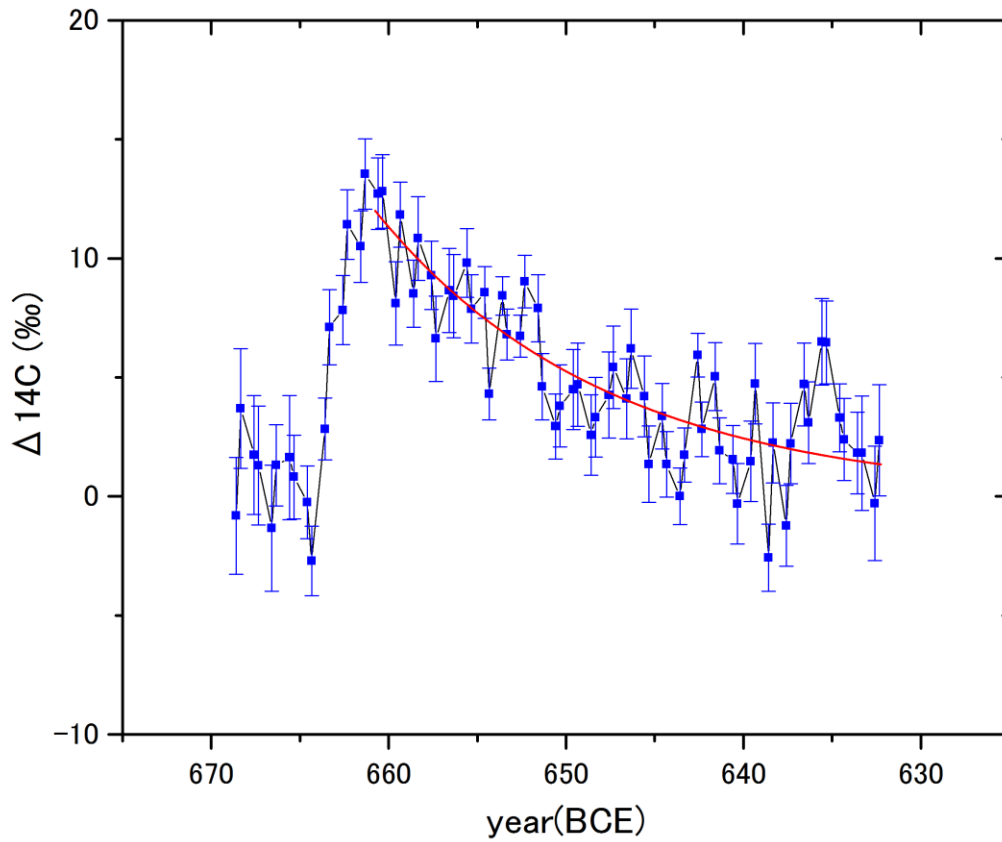

Fig. S5: The red line expresses an exponential function fitted to the dataset of earlywoods and latewoods with a least squares method. It indicates that injected  $^{14}\text{C}$  in the atmosphere with a short term are dissolved in the ocean by a carbon cycle process.

Table S1: Obtained fitted parameters for the single-pulsed event. The ranges of parameters show 95% confidence level.

| Condition            |                  | Event start date [BCE] | Duration [month] | Production rate<br>[ $10^8$ atoms/cm $^2$ ] |
|----------------------|------------------|------------------------|------------------|---------------------------------------------|
| Exchange rate [year] | Share rate [t:s] |                        |                  |                                             |
| 1.5                  | 70:30            | 663.5-665.0            | 1-41             | 1.3-1.5                                     |
| 1.5                  | 80:20            | 663.5-665.1            | 1-39             | 1.3-1.5                                     |
| 1.5                  | 90:10            | 663.5-665.2            | 1-37             | 1.3-1.5                                     |
| 2.0                  | 70:30            | 663.5-664.8            | 1-34             | 1.3-1.6                                     |
| 2.0                  | 80:20            | 663.5-664.9            | 1-32             | 1.3-1.6                                     |
| 2.0                  | 90:10            | 663.6-665.0            | 1-30             | 1.3-1.6                                     |



Table S2: Obtained fitted parameters for the double-pulsed event. The ranges of parameters show 95% confidence level. Durations of first and second pulses are fixed to 1 month.

| Condition          |                  | Event start               | First pulse                              | Second pulse                             | Pulse interval |
|--------------------|------------------|---------------------------|------------------------------------------|------------------------------------------|----------------|
| Exchange rate [yr] | Share rate [t:s] | date of first pulse [BCE] | Production rate [ $10^8$ atoms/cm $^2$ ] | Production rate [ $10^8$ atoms/cm $^2$ ] | [month]        |
| 1.5                | 70:30            | 663.5-664.1               | 0.99-1.1                                 | 0.25-0.47                                | 2-27           |
| 1.5                | 80:20            | 663.5-664.1               | 1.1-1.1                                  | 0.13-0.45                                | 2-35           |
| 1.5                | 90:10            | 663.6-664.3               | 1.1-1.2                                  | 0.13-0.30                                | 2-32           |

Table S3: Measured data set of  $^{14}\text{C}$  in earlywoods and latewoods of annual rings of the Choukai–Jindai Cedar for 669–633 BCE. See the Methods for  $\Delta^{14}\text{C}$  and error.

| Year (BCE) | Earlywood/Latewood | $\Delta^{14}\text{C}(\text{‰})$ | error(‰) |
|------------|--------------------|---------------------------------|----------|
| 669        | Ew                 | -0.8                            | 2.5      |
| 669        | Lw                 | 3.7                             | 2.5      |
| 668        | Ew                 | 1.7                             | 2.5      |
| 668        | Lw                 | 1.3                             | 2.5      |
| 667        | Ew                 | -1.3                            | 2.6      |
| 667        | Lw                 | 1.3                             | 1.7      |
| 666        | Ew                 | 1.6                             | 2.6      |
| 666        | Lw                 | 0.8                             | 1.8      |
| 665        | Ew                 | -0.2                            | 1.5      |
| 665        | Lw                 | -2.7                            | 1.5      |
| 664        | Ew                 | 2.8                             | 1.3      |
| 664        | Lw                 | 7.1                             | 1.6      |
| 663        | Ew                 | 7.8                             | 1.5      |
| 663        | Lw                 | 11.4                            | 1.5      |
| 662        | Ew                 | 10.5                            | 1.5      |
| 662        | Lw                 | 13.5                            | 1.5      |
| 661        | Ew                 | 12.7                            | 1.5      |
| 661        | Lw                 | 12.8                            | 1.6      |
| 660        | Ew                 | 8.1                             | 1.8      |
| 660        | Lw                 | 11.8                            | 1.4      |
| 659        | Ew                 | 8.5                             | 1.4      |
| 659        | Lw                 | 10.8                            | 1.8      |

|     |    |      |     |
|-----|----|------|-----|
| 658 | Ew | 9.3  | 1.4 |
| 658 | Lw | 6.6  | 1.8 |
| 657 | Ew | 8.7  | 1.8 |
| 657 | Lw | 8.4  | 1.8 |
| 656 | Ew | 9.8  | 1.4 |
| 656 | Lw | 7.9  | 1.4 |
| 655 | Ew | 8.6  | 1.1 |
| 655 | Lw | 4.3  | 1.1 |
| 654 | Ew | 8.4  | 0.8 |
| 654 | Lw | 6.8  | 1.1 |
| 653 | Ew | 6.7  | 0.9 |
| 653 | Lw | 9.0  | 1.1 |
| 652 | Ew | 7.9  | 1.4 |
| 652 | Lw | 4.6  | 1.4 |
| 651 | Ew | 2.9  | 1.4 |
| 651 | Lw | 3.8  | 1.7 |
| 650 | Ew | 4.5  | 1.7 |
| 650 | Lw | 4.7  | 1.8 |
| 649 | Ew | 2.6  | 1.7 |
| 649 | Lw | 3.3  | 1.7 |
| 648 | Ew | 4.3  | 1.8 |
| 648 | Lw | 5.4  | 1.7 |
| 647 | Ew | 4.1  | 1.7 |
| 647 | Lw | 6.2  | 1.7 |
| 646 | Ew | 4.2  | 1.7 |
| 646 | Lw | 1.4  | 1.6 |
| 645 | Ew | 3.4  | 1.4 |
| 645 | Lw | 1.3  | 1.4 |
| 644 | Ew | 0.0  | 1.2 |
| 644 | Lw | 1.7  | 1.1 |
| 643 | Ew | 5.9  | 0.9 |
| 643 | Lw | 2.8  | 1.1 |
| 642 | Ew | 5.0  | 1.4 |
| 642 | Lw | 1.9  | 1.4 |
| 641 | Ew | 1.5  | 1.4 |
| 641 | Lw | -0.3 | 1.7 |
| 640 | Ew | 1.5  | 1.7 |

|     |    |      |     |
|-----|----|------|-----|
| 640 | Lw | 4.7  | 1.7 |
| 639 | Ew | -2.6 | 1.4 |
| 639 | Lw | 2.2  | 1.7 |
| 638 | Ew | -1.2 | 1.7 |
| 638 | Lw | 2.2  | 1.7 |
| 637 | Ew | 4.7  | 1.7 |
| 637 | Lw | 3.1  | 1.7 |
| 636 | Ew | 6.5  | 1.8 |
| 636 | Lw | 6.5  | 1.7 |
| 635 | Ew | 3.3  | 1.4 |
| 635 | Lw | 2.4  | 1.7 |
| 634 | Ew | 1.8  | 1.7 |
| 634 | Lw | 1.8  | 2.4 |
| 633 | Ew | -0.3 | 2.4 |
| 633 | Lw | 2.4  | 2.3 |
